# Supplementary material for: Fifteen-year changes in health-related quality of life after bariatric surgery and non-surgical obesity treatment
Source: PubMed Central journal article supplement (PMC11420074; doi:10.1038/s41366-024-01572-w), 2024-06-20
Supplement: 41366_2024_1572_MOESM1_ESM.pdf [file 41366_2024_1572_MOESM1_ESM.pdf]

**Supplementary Table 1.** International Classification of Diseases (ICD) codes used to identify patients with health-care visits for mental disorders, substance abuse and non-fatal self-harm.

| <b>Condition</b>    | <b>ICD-8</b>                                | <b>ICD-9</b>                                                                          | <b>ICD-10</b>                                                                                     |
|---------------------|---------------------------------------------|---------------------------------------------------------------------------------------|---------------------------------------------------------------------------------------------------|
| Mental disorders    | 290-315                                     | 290-319                                                                               | Chapter F                                                                                         |
| Substance abuse     | 291; 394,3; 303-304;<br>970,00; 971; 989,99 | 291-292, 303-304, 305A,<br>305B, 305X, 357F, 425F,<br>535D, 571A, 571B, 571C,<br>571D | F10-F19, G621, I426,<br>G721, K292, K700-K704,<br>K709, K852, K860, G312,<br>Z714-Z715, Z721-Z722 |
| Non-fatal self-harm | E950-959, E980-989                          | E950-959, E980-989                                                                    | X60-84, Y10-34, Y870                                                                              |

**Supplementary Table 2.** Fifteen-year mean changes in HRQoL scales by baseline education and relationship status and surgery type in the SOS surgery group estimated using mixed-models.<sup>1</sup>

|                                             | Education       |                 | Relationship status  |                           | Surgery type     |                |                |
|---------------------------------------------|-----------------|-----------------|----------------------|---------------------------|------------------|----------------|----------------|
|                                             | Basic<br>N=1393 | Higher<br>N=614 | Not married<br>N=547 | Married/partner<br>N=1460 | Banding<br>N=376 | VBG<br>N=1365  | GBP<br>N=266   |
| Perceived health <sup>2</sup>               |                 |                 |                      |                           |                  |                |                |
| Mean                                        | 4.7             | 5.3             | 3.7                  | 5.4                       | 3.9              | 5.6            | 6.6            |
| 95% CI                                      | 2.5 to 7.0      | 1.9 to 8.6      | -0.1 to 7.4          | 3.3 to 7.5                | -0.5 to 8.3      | 3.4 to 7.8     | 1.4 to 11.7    |
| P <sup>4</sup>                              | 0.799           |                 | 0.429                |                           | ref.             | 0.451          | 0.412          |
| Anxiety <sup>3</sup>                        |                 |                 |                      |                           |                  |                |                |
| Mean                                        | -1.4            | -1.2            | -1.4                 | -1.3                      | -1.9             | -1.3           | -1.4           |
| 95% CI                                      | -1.8 to -1.1    | -1.7 to -0.7    | -2.0 to -0.9         | -1.7 to -1.0              | -2.5 to -1.3     | -1.6 to -1.0   | -2.1 to -0.7   |
| P <sup>4</sup>                              | 0.455           |                 | 0.801                |                           | ref.             | 0.100          | 0.344          |
| Depression <sup>3</sup>                     |                 |                 |                      |                           |                  |                |                |
| Mean                                        | -1.1            | -1.0            | -0.9                 | -1.1                      | -1.4             | -1.0           | -1.0           |
| 95% CI                                      | -1.4 to -0.8    | -1.4 to -0.5    | -1.4 to -0.4         | -1.4 to -0.8              | -2.0 to -0.8     | -1.3 to -0.8   | -1.7 to -0.4   |
| P <sup>4</sup>                              | 0.619           |                 | 0.461                |                           | ref.             | 0.288          | 0.475          |
| Overall mood <sup>2</sup>                   |                 |                 |                      |                           |                  |                |                |
| Mean                                        | 0.2             | 0.2             | 0.2                  | 0.2                       | 0.2              | 0.2            | 0.2            |
| 95% CI                                      | 0.1 to 0.2      | 0.1 to 0.2      | 0.1 to 0.2           | 0.1 to 0.2                | 0.1 to 0.3       | 0.1 to 0.2     | 0.1 to 0.3     |
| P <sup>4</sup>                              | 0.832           |                 | 0.695                |                           | ref.             | 0.378          | 0.854          |
| Obesity-related problems <sup>3</sup>       |                 |                 |                      |                           |                  |                |                |
| Mean                                        | -27.6           | -30.7           | -27.3                | -29.1                     | -27.1            | -28.2          | -35.3          |
| 95% CI                                      | -29.6 to -25.5  | -33.8 to -27.6  | -30.7 to -23.9       | -31.0 to -27.1            | -31.1 to -23.1   | -30.2 to -26.2 | -40.0 to -30.6 |
| P <sup>4</sup>                              | 0.094           |                 | 0.369                |                           | ref.             | 0.525          | <b>0.009</b>   |
| Social interaction limitations <sup>3</sup> |                 |                 |                      |                           |                  |                |                |
| Mean                                        | -4.4            | -4.4            | -3.5                 | -4.7                      | -5.2             | -4.3           | -6.1           |
| 95% CI                                      | -5.3 to -3.5    | -5.8 to -2.9    | -5.0 to -1.9         | -5.7 to -3.8              | -7.1 to -3.4     | -5.2 to -3.3   | -8.3 to -4.0   |
| P <sup>4</sup>                              | 0.967           |                 | 0.168                |                           | ref.             | 0.446          | 0.481          |

<sup>1</sup>Analyses adjusted for sex, age, baseline BMI and baseline HRQoL scale.

<sup>2</sup>Increased scores represent improved perceived health and overall mood, respectively.

<sup>3</sup>Decreased scores represent reduced anxiety, depression, obesity-related problems and social interaction limitations, respectively.

<sup>4</sup>Difference in 15-year change between the groups (adjusted for sex, age, baseline BMI and the respective HRQoL scale at baseline).

**Supplementary Table 3.** Baseline characteristics of 15-year study completers and non-completers (excluding deaths before 15-year follow-up) in the SOS control and surgery groups.

|                                             | Control                 |                               |                      |                          | Surgery             |                             |                      |                          |
|---------------------------------------------|-------------------------|-------------------------------|----------------------|--------------------------|---------------------|-----------------------------|----------------------|--------------------------|
|                                             | Completers<br>N=758     | Non-completers<br>N=1062-1065 | P value <sup>1</sup> | Effect size <sup>2</sup> | Completers<br>N=923 | Non-completers<br>N=920-922 | P value <sup>1</sup> | Effect size <sup>2</sup> |
| Age (years)                                 | 48.2 (6.0) <sup>3</sup> | 48.5 (6.4)                    | 0.323                | 0.05                     | 47.2 (5.8)          | 46.8 (6.0)                  | 0.101                | 0.08                     |
| Men (%)                                     | 31.0                    | 25.2                          | 0.007                |                          | 30.1                | 26.0                        | 0.055                |                          |
| BMI (kg/m <sup>2</sup> )                    | 39.7 (4.5)              | 40.4 (4.7)                    | 0.001                | 0.15                     | 42.2 (4.4)          | 42.5 (4.5)                  | 0.104                | 0.08                     |
| Perceived health <sup>4</sup>               | 59.0 (25.6)             | 57.2 (25.6)                   | 0.134                | 0.07                     | 52.7 (24.1)         | 48.6 (25.1)                 | <0.001               | 0.17                     |
| Anxiety <sup>4</sup>                        | 5.2 (4.5)               | 5.5 (4.6)                     | 0.177                | 0.06                     | 5.8 (4.4)           | 6.0 (4.5)                   | 0.455                | 0.03                     |
| Depression <sup>4</sup>                     | 3.9 (3.2)               | 4.3 (3.7)                     | 0.016                | 0.12                     | 5.0 (3.6)           | 5.4 (3.6)                   | 0.015                | 0.11                     |
| Overall mood <sup>4</sup>                   | 3.1 (0.6)               | 3.0 (0.6)                     | <0.001               | 0.16                     | 2.9 (0.6)           | 2.8 (0.6)                   | 0.005                | 0.13                     |
| Obesity-related problems <sup>4</sup>       | 39.4 (26.9)             | 42.6 (26.8)                   | 0.012                | 0.12                     | 56.7 (26.5)         | 60.2 (26.9)                 | 0.005                | 0.13                     |
| Social interaction limitations <sup>4</sup> | 7.6 (10.6)              | 10.0 (13.0)                   | <0.001               | 0.20                     | 12.8 (12.6)         | 14.4 (14.0)                 | 0.009                | 0.12                     |

<sup>1</sup>Differences between the completers and non-completers were tested using t-tests (continuous variables) or Fisher's exact tests (categorical variables).

<sup>2</sup>Effect size (between-group) was calculated by dividing the difference in baseline mean between the completers and non-completers by the pooled standard deviation of mean. It was judged against the following criteria: trivial (0 to <0.2), small (0.2 to <0.5), moderate (0.5 to <0.8) and large ( $\geq$ 0.8).(30)

<sup>3</sup>Mean (SD), all such values.

<sup>4</sup>Perceived health: higher scores represent better perceived health (score range 0–100). Anxiety and depression: higher scores represent more symptoms (score range 0–21). Overall mood: higher scores represent more positive mood states (score range 1–4). Obesity-related problems and social interaction limitations: higher scores represent more dysfunction (score range 0–100).

A. Body mass index

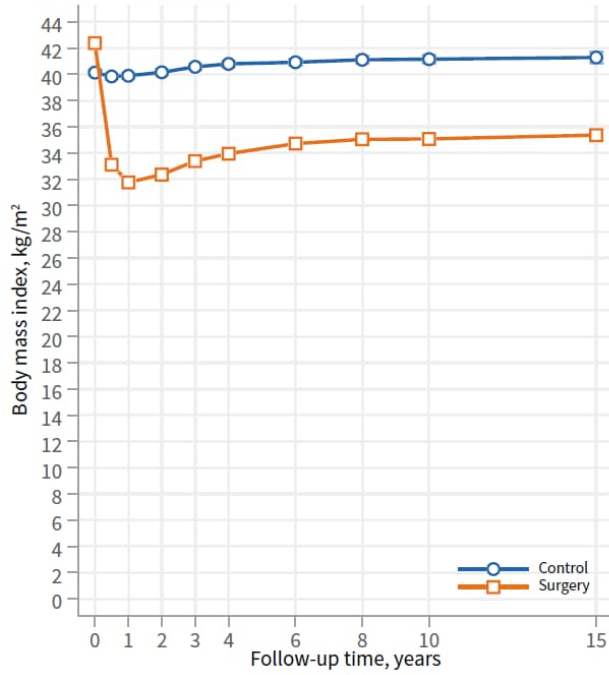

B. Relative change in body mass index

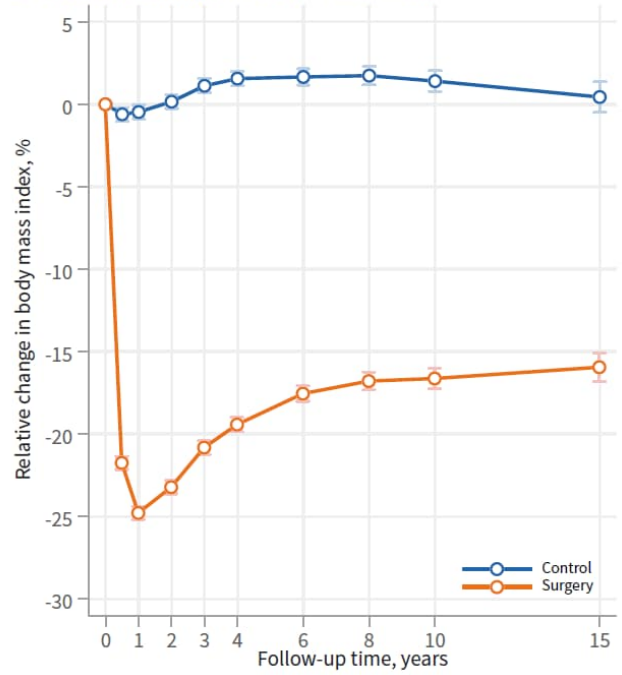

**Supplementary Figure 1.** Absolute levels (mean and 95% CI) of body mass index (A) and relative changes (mean and 95% CI) in body mass index (B) by treatment group over 15 years of follow-up.
